# Supplementary material for: N-Aminopyrroledione–hydrazonoketene–pyrazolium oxide–pyrazolone rearrangements and pyrazolone tautomerism
Source: Royal Society of Chemistry journal article supplement (doi:10.1039/b304070d), 2003-01-01
Supplement: b304070d.doc [file b304070d.doc]

# Electronic supplementary information

***N*-Aminopyrroledione – Hydrazonoketene – Pyrazolium Oxide – Pyrazolone Rearrangements and Pyrazolone Tautomerism**

**Sieglinde Ebner,a,b Bianca Wallfisch,a,b John Andraos,a Ilyas Aitbaev,b Michael Kiselewsky,a Paul V. Bernhardt,a Gert Kollenzb and Curt Wentrupa***

a*Department of Chemistry, School of Molecular and Microbial Sciences, The University of Queensland, Brisbane, Qld 4072, Australia*

b*Institut für Chemie, Karl-Franzens-Universität Graz, A-8010 Graz, Austria*

*E-mail:* [wentrup@uq.edu.au](mailto:wentrup@uq.edu.au)

## Figure S1: Observed and calculated IR spectra of pyrazolium oxide 8a

## Figures S2 and S3: ORTEP and crystal packing diagram for compound 14

Tables S1-S3: bond lengths and angles for compund **14**

**Figure S1.** IR spectra of pyrazolium oxide **8a**; (top) calculated at the B3LYP/6-31G* level; (middle) calculated at the B3LYP/6-31+G* level; (bottom) experimental, Ar matrix, 10 K (ordinates in arbitrary absorbance units)

## Figures S2 and S3. ORTEP and crystal packing diagram for compound 14


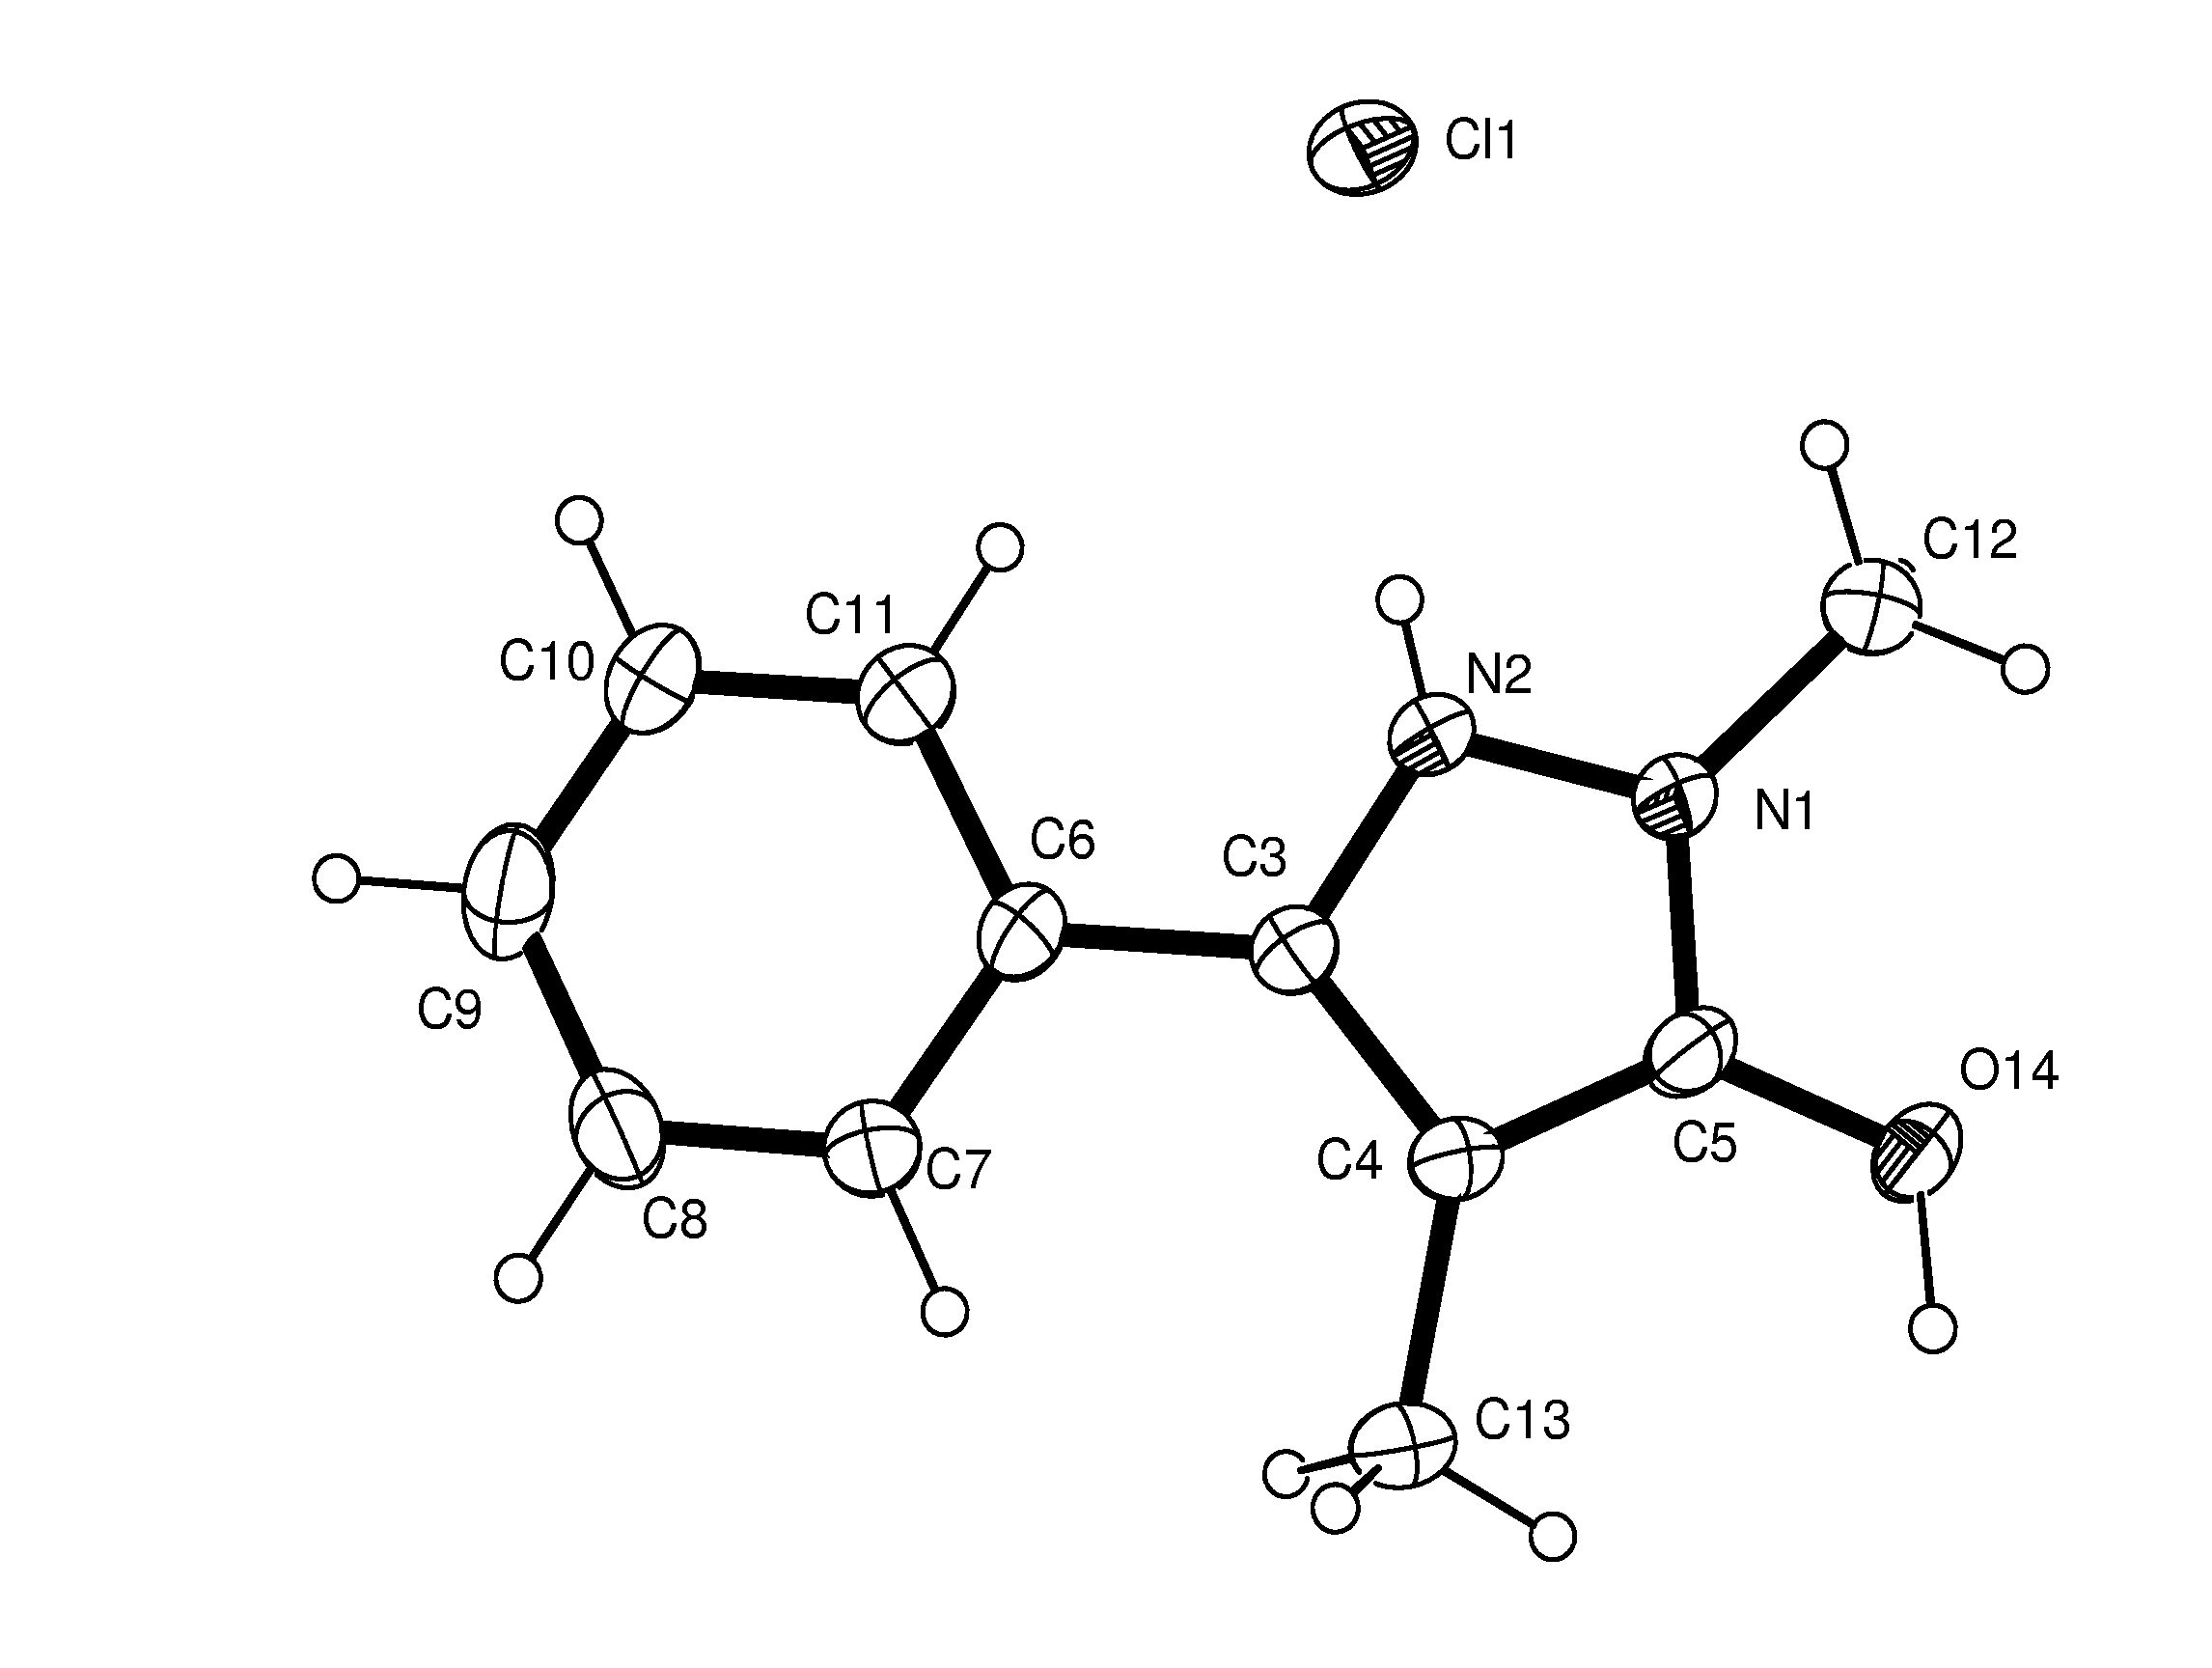


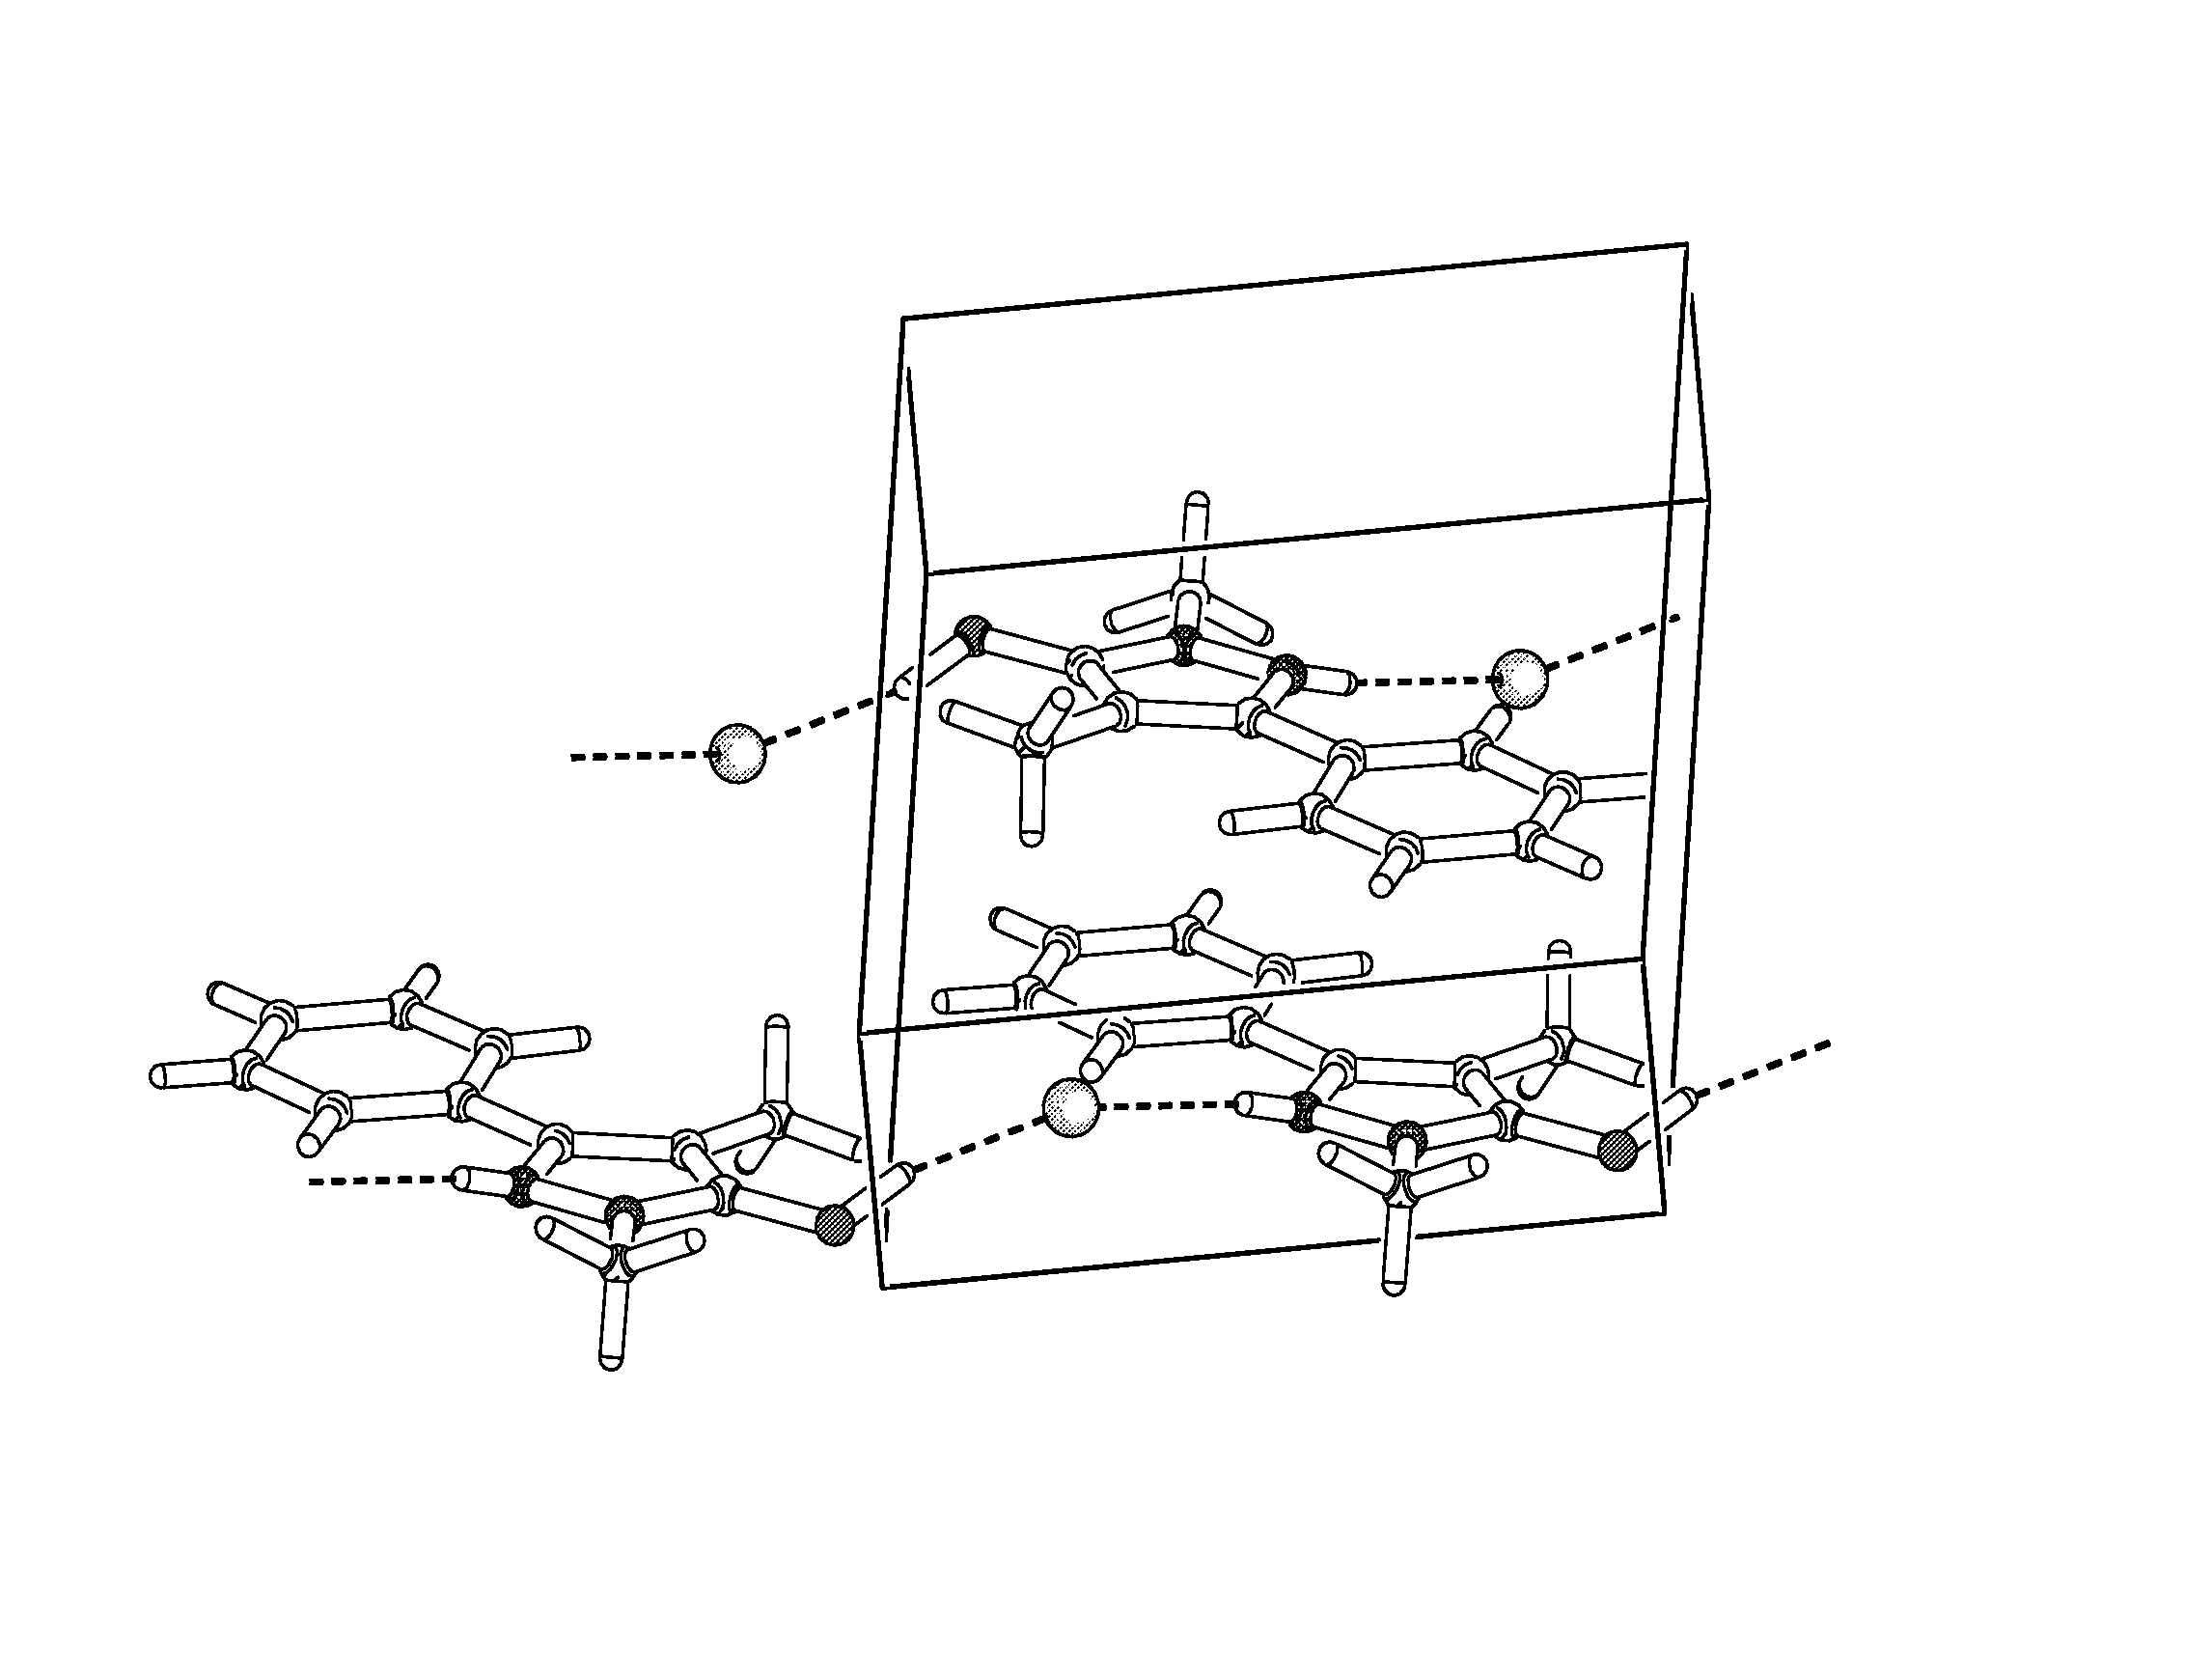


0

*c*

*b*

*a*

O14

Cl1

N2

Table S1. Bond lengths [Å] and angles [°] for **14**.

_____________________________________________________

C(3)-N(2) 1.346(6)

C(3)-C(4) 1.391(6)

C(3)-C(6) 1.473(6)

C(4)-C(5) 1.379(6)

C(4)-C(14) 1.507(6)

C(5)-N(1) 1.326(5)

C(5)-O(14) 1.329(5)

C(6)-C(7) 1.382(7)

C(6)-C(11) 1.394(6)

C(7)-C(8) 1.373(7)

C(8)-C(9) 1.370(8)

C(9)-C(10) 1.353(8)

C(10)-C(11) 1.371(7)

C(12)-N(1) 1.454(6)

N(1)-N(2) 1.352(5)

N(2)-C(3)-C(4) 107.6(4)

N(2)-C(3)-C(6) 120.0(4)

C(4)-C(3)-C(6) 132.4(4)

C(5)-C(4)-C(3) 105.1(4)

C(5)-C(4)-C(14) 124.7(4)

C(3)-C(4)-C(14) 130.1(4)

N(1)-C(5)-O(14) 116.5(4)

N(1)-C(5)-C(4) 110.3(4)

O(14)-C(5)-C(4) 133.1(4)

C(7)-C(6)-C(11) 117.6(4)

C(7)-C(6)-C(3) 121.7(4)

C(11)-C(6)-C(3) 120.7(4)

C(8)-C(7)-C(6) 121.0(5)

C(9)-C(8)-C(7) 120.4(5)

C(10)-C(9)-C(8) 119.4(5)

C(9)-C(10)-C(11) 121.3(5)

C(10)-C(11)-C(6) 120.4(5)

C(5)-N(1)-N(2) 107.4(3)

C(5)-N(1)-C(12) 129.4(4)

N(2)-N(1)-C(12) 123.2(4)

C(3)-N(2)-N(1) 109.6(4)

_____________________________________________________________

Symmetry transformations used to generate equivalent atoms:

Table S2. Torsion angles [°] for **14**.

________________________________________________________________

N(2)-C(3)-C(4)-C(5) 1.2(6)

C(6)-C(3)-C(4)-C(5) -178.9(5)

N(2)-C(3)-C(4)-C(14) -177.3(6)

C(6)-C(3)-C(4)-C(14) 2.6(9)

C(3)-C(4)-C(5)-N(1) -0.1(6)

C(14)-C(4)-C(5)-N(1) 178.5(5)

C(3)-C(4)-C(5)-O(14) -177.4(6)

C(14)-C(4)-C(5)-O(14) 1.2(10)

N(2)-C(3)-C(6)-C(7) -175.3(5)

C(4)-C(3)-C(6)-C(7) 4.9(9)

N(2)-C(3)-C(6)-C(11) 2.8(7)

C(4)-C(3)-C(6)-C(11) -177.1(5)

C(11)-C(6)-C(7)-C(8) 1.9(9)

C(3)-C(6)-C(7)-C(8) 180.0(5)

C(6)-C(7)-C(8)-C(9) -1.6(10)

C(7)-C(8)-C(9)-C(10) 0.2(10)

C(8)-C(9)-C(10)-C(11) 0.7(10)

C(9)-C(10)-C(11)-C(6) -0.4(10)

C(7)-C(6)-C(11)-C(10) -0.9(9)

C(3)-C(6)-C(11)-C(10) -179.1(5)

O(14)-C(5)-N(1)-N(2) 176.8(5)

C(4)-C(5)-N(1)-N(2) -1.1(6)

O(14)-C(5)-N(1)-C(12) -1.3(8)

C(4)-C(5)-N(1)-C(12) -179.2(5)

C(4)-C(3)-N(2)-N(1) -1.9(5)

C(6)-C(3)-N(2)-N(1) 178.2(4)

C(5)-N(1)-N(2)-C(3) 1.9(5)

C(12)-N(1)-N(2)-C(3) -179.9(5)

________________________________________________________________

Symmetry transformations used to generate equivalent atoms:

Table S3. Hydrogen Bonds for **14**.

Distance D..A

3.048(4) N2 … Cl1

2.914(4) O14 … Cl1_$1

Distance H..A

2.33(6) H2…Cl1

1.96(8) H14…Cl1_$1

Angle DH..A

170(6) N2 - H2…Cl1

162(6) O14 - H14…Cl1_$1

Symmetry transformation: $1 *x,* 1-*y, z*
